# Supplementary material for: Long-term evaluation parameters in GNE myopathy: a 5-year observational follow-up natural history study
Source: HighWire-hosted journal article supplement (doi:10.1136/bmjno-2022-000362), 2022-12-01
Supplement: bmjno-2022-000362supp006_data_supplement.pdf [file bmjno-2022-000362supp006_data_supplement.pdf]

Supplementary table w  
Correlation between quantitative items and simplified items

|            | Grip Power | Pinch Power | %FVC    | CK      | DEXA LEGs | MMT Elbow Flex | MMT Knee Ext |
|------------|------------|-------------|---------|---------|-----------|----------------|--------------|
| summed MMT | 0.795**    | 0.689**     | 0.720** | 0.742** | 0.542*    | 0.942***       | 0.760**      |
| GMFM       | 0.738**    | 0.629**     | 0.693** | 0.572*  | 0.452*    | 0.886***       | 0.636**      |
| 6MWT       | 0.839***   | 0.800***    | 0.140   | 0.084   | 0.139     | 0.358          | 0.134        |
| DEXA Legs  | 0.610**    | 0.633**     | 0.437*  | 0.495*  | -         | 0.567*         | 0.466*       |

\*\*\* very strong correlation  $\rho \geq 0.8$   
\*\*strong correlation  $0.6 \leq \rho < 0.8$   
\*: moderate correlation  $0.4 \leq \rho < 0.6$

Quantitative items such as Summed MMT and GMFM were well correlated with pinch power, grip power, %VC or %FVC, CK, and DEXA (legs). These items were also correlated with certain muscle MMT scores (e.g., elbow flexion and knee extension).
